# Supplementary material for: Cryptic Diversity and Demographic Expansion of Plasmodium knowlesi Malaria Vectors in Malaysia
Source: MDPI journal article supplement (doi:10.3390/genes14071369), 2023-06-28
Supplement: s1 [file s1]

**Table S2.** Summary of *ITS2* diversity and neutrality test in *An. introlatus*, *An. latens*, *An. cracens* and *An. balabacensis*. Values marked with asterisk indicate significant: \* $p < 0.05$ , \*\* $p < 0.01$ , \*\*\* $p < 0.001$ .

| Species               | Subpopulation             | No of haplotypes, H | Nucleotide diversity, $\pi$ | Haplotype diversity, Hd | Neutrality test |           |
|-----------------------|---------------------------|---------------------|-----------------------------|-------------------------|-----------------|-----------|
|                       |                           |                     |                             |                         | Tajima's D      | Fu's Fs   |
| <i>An. introlatus</i> | <b>JOHOR</b>              |                     |                             |                         |                 |           |
|                       | Gunung Pant               | 3                   | 0.00073 $\pm$ 0.00033       | 0.524 $\pm$ 0.209       | -1.237          | -0.922    |
|                       | Kg. Seri Delima           | 1                   | -                           | -                       | -               | -         |
|                       | Kem Microwave             | 3                   | 0.00017 $\pm$ 0.00017       | 0.132 $\pm$ 0.068       | -1.304          | -2.149    |
|                       | Hutan Lengg               | 2                   | 0.00006 $\pm$ 0.00006       | 0.045 $\pm$ 0.043       | -1.115          | -1.530    |
|                       | Kongsi Balak              | 7                   | 0.00091 $\pm$ 0.00091       | 0.484 $\pm$ 0.100       | -1.664          | -3.802    |
|                       | Kg. OA Punjut             | 1                   | -                           | -                       | -               | -         |
|                       | Kg. OA Berasau            | 1                   | -                           | -                       | -               | -         |
|                       | Total                     | 10                  | 0.00036 $\pm$ 0.00036       | 0.226 $\pm$ 0.049       | -2.078*         | -11.886   |
|                       | <b>KELANTAN</b>           |                     |                             |                         |                 |           |
|                       | Kg. Lalang                | 1                   | 0.00000 $\pm$ 0.00000       | 0.000 $\pm$ 0.000       | 0.000           | 0.000     |
|                       | Kg. Dusun Durian          | 1                   | -                           | -                       | -               | -         |
|                       | Kg. Lebur Jaya            | 1                   | -                           | -                       | -               | -         |
|                       | Total                     | 1                   | 0.00000 $\pm$ 0.00000       | 0.000 $\pm$ 0.000       | 0.000           | 0.000     |
|                       | <b>PAHANG</b>             |                     |                             |                         |                 |           |
|                       | Kem Sri Gading            | 2                   | 0.00026 $\pm$ 0.00026       | 0.200 $\pm$ 0.154       | -1.112          | 0.339     |
|                       | Total                     | 2                   | 0.00026 $\pm$ 0.00026       | 0.200 $\pm$ 0.154       | -1.112          | 0.339     |
|                       | <b>PERAK</b>              |                     |                             |                         |                 |           |
|                       | Kg. Sg Dara               | 1                   | 0.00000 $\pm$ 0.00000       | 0.000 $\pm$ 0.000       | 0.000           | 0.000     |
|                       | Kg. Draco                 | 1                   | 0.00000 $\pm$ 0.00000       | 0.000 $\pm$ 0.000       | -               | -         |
|                       | Total                     | 1                   | 0.00000 $\pm$ 0.00000       | 0.000 $\pm$ 0.000       | 0.000           | 0.000     |
|                       | <b>NEGERI SEMBILAN</b>    |                     |                             |                         |                 |           |
|                       | Kebun Durian Tekir        | 1                   | 0.00000 $\pm$ 0.00000       | 0.000 $\pm$ 0.000       | -               | -         |
|                       | Hutan Lenggeng            | 1                   | 0.00051 $\pm$ 0.00030       | 0.400 $\pm$ 0.237       | -0.817          | 0.090     |
|                       | Total                     | 2                   | 0.00037 $\pm$ 0.00037       | 0.286 $\pm$ 0.196       | -1.006          | -0.095    |
|                       | <b>SELANGOR</b>           |                     |                             |                         |                 |           |
|                       | Hulu Kalong               | 5                   | 0.00513 $\pm$ 0.00124       | 1.000 $\pm$ 0.126       | -1.193          | -1.716    |
|                       | Sg. Sendat                | 5                   | 0.00411 $\pm$ .00412        | 1.000 $\pm$ 0.126       | 1.174           | -2.116    |
|                       | Total                     | 10                  | 0.00456 $\pm$ 0.00458       | 1.000 $\pm$ 0.045       | -1.899*         | -7.454*   |
|                       | <b>Overall Total</b>      | 21                  | 0.00057 $\pm$ 0.00057       | 0.283 $\pm$ 0.045       | -2.604***       | -32.340** |
| <i>An. latens</i>     | <b>JOHOR</b>              |                     |                             |                         |                 |           |
|                       | Gunung Pant               | 2                   | 0.00080 $\pm$ 0.00037       | 0.324 $\pm$ 0.136       | -0.697          | -0.623    |
|                       | Total                     | 2                   | 0.00080 $\pm$ 0.00037       | 0.324 $\pm$ 0.136       | -0.697          | -0.623    |
|                       | <b>KELANTAN</b>           |                     |                             |                         |                 |           |
|                       | Kg. Lalang                | 2                   | 0.00100 $\pm$ 0.00018       | 0.533 $\pm$ 0.095       | 1.303           | 1.029     |
|                       | Total                     | 2                   | 0.00100 $\pm$ 0.00018       | 0.533 $\pm$ 0.095       | 1.303           | 1.029     |
|                       | <b>SABAH</b>              |                     |                             |                         |                 |           |
|                       | Danum Valley Field Centre | 12                  | 0.00582 $\pm$ 0.00099       | 0.956 $\pm$ 0.033       | -1.827*         | -6.395    |
|                       | Total                     | 12                  | 0.00582 $\pm$ 0.00099       | 0.956 $\pm$ 0.033       | -1.827*         | -6.395    |
|                       | <b>SARAWAK</b>            |                     |                             |                         |                 |           |
|                       | Taman Ixora               | 1                   | -                           | -                       | -               | -         |
|                       | Kg. Sawang                | 1                   | -                           | -                       | -               | -         |
|                       | Rumah Sewa Panto          | 2                   | 0.00674 $\pm$ 0.00358       | 0.500 $\pm$ 0.265       | -0.817          | 3.251     |
|                       | Total                     | 2                   | 0.00450 $\pm$ 0.00290       | 0.333 $\pm$ 0.215       | -1.390          | 3.361     |
|                       | <b>Overall Total</b>      | 16                  | 0.02072 $\pm$ 0.00098       | 0.785 $\pm$ 0.054       | 0.883           | 1.901     |
| <i>An. cracens</i>    | <b>PAHANG</b>             |                     |                             |                         |                 |           |
|                       | Sg. Ular                  | 10                  | 0.00201 $\pm$ 0.00051       | 0.737 $\pm$ 0.111       | -2.345**        | -6.501**  |
|                       | Kem Sri Gading            | 3                   | 0.00066 $\pm$ 0.00012       | 0.444 $\pm$ 0.071       | 0.018           | 0.128     |
|                       | Total                     | 12                  | 0.00117 $\pm$ 0.00023       | 0.562 $\pm$ 0.071       | -2.292          | -9.187    |
|                       | <b>PERLIS</b>             |                     |                             |                         |                 |           |

|                         |                          |    |                   |               |          |           |
|-------------------------|--------------------------|----|-------------------|---------------|----------|-----------|
|                         | Perlis                   | 4  | 0.00517 ± 0.00105 | 0.900 ± 0.161 | 0.913    | 0.051     |
|                         | Total                    | 4  | 0.00517 ± 0.00105 | 0.900 ± 0.161 | 0.913    | 0.051     |
|                         | <b>Overall Total</b>     | 15 | 0.00165 ± 0.00035 | 0.611 ± 0.067 | -2.372** | -10.779** |
| <i>An. balabacensis</i> | <b>SARAWAK</b>           |    |                   |               |          |           |
|                         | Kem Kayu Balak Merarap   | 1  | 0.0000 ± 0.0000   | 0.000 ± 0.000 | 0.000    | 0.000     |
|                         | Simpang Utong            | 2  | 0.00127 ± 0.00060 | 0.667 ± 0.314 | -        | -         |
|                         | Kebun Ldg Sawit Jelapang | 1  | 0.00000 ± 0.00000 | 0.000 ± 0.000 | -        | -         |
|                         | Total                    | 2  | 0.00015 ± 0.00013 | 0.077 ± 0.070 | -1.156   | -1.094    |
|                         | <b>SABAH</b>             |    |                   |               |          |           |
|                         | Paradason                | 1  | 0.00000 ± 0.00000 | 0.000 ± 0.000 | 0.000    | 0.000     |
|                         | Limbuak Laut             | 9  | 0.00395 ± 0.00080 | 0.939 ± 0.058 | -1.790*  | -5.622*   |
|                         | Kudat                    | 1  | 0.00000 ± 0.00000 | 0.000 ± 0.000 | 0.000    | 0.000     |
|                         | Total                    | 9  | 0.00152 ± 0.00046 | 0.488 ± 0.109 | -2.244** | -6.395**  |
|                         | <b>Overall total</b>     | 10 | 0.00091 ± 0.00028 | 0.317 ± 0.080 | -2.351** | -9.865**  |
