# Supplementary material for: Cryptic Diversity and Demographic Expansion of Plasmodium knowlesi Malaria Vectors in Malaysia
Source: MDPI journal article supplement (doi:10.3390/genes14071369), 2023-06-28
Supplement: s1 [file s1]

**Table S1.** Summary of *CO1* diversity and neutrality test in *An. introlatus*, *An. latens*, *An. cracens* and *An. balabacensis*. Values marked with asterisk indicate significant: \* $p < 0.05$ , \*\* $p < 0.01$ , \*\*\* $p < 0.001$ .

| Species               | Subpopulation             | No of haplotypes, H | Nucleotide diversity, $\pi$ | Haplotype diversity, Hd | Neutrality test |          |
|-----------------------|---------------------------|---------------------|-----------------------------|-------------------------|-----------------|----------|
|                       |                           |                     |                             |                         | Tajima's D      | Fu's Fs  |
| <i>An. introlatus</i> | <b>JOHOR</b>              |                     |                             |                         |                 |          |
|                       | Gunung Pant               | 2                   | 0.00372 $\pm$ 0.00255       | 0.286 $\pm$ 0.196       | -1.576          | 3.644    |
|                       | Kg. Seri Delima           | 1                   | -                           | -                       | -               | -        |
|                       | Kem Microwave             | 9                   | 0.00563 $\pm$ 0.00085       | 0.772 $\pm$ 0.052       | -0.029          | 0.605    |
|                       | Hutan Lengg               | 8                   | 0.00264 $\pm$ 0.00076       | 0.648 $\pm$ 0.072       | -1.674          | -2.253   |
|                       | Kongsi Balak              | 7                   | 0.00504 $\pm$ 0.00102       | 0.755 $\pm$ 0.061       | 0.503           | 1.296    |
|                       | Kg. OA Punjut             | 1                   | -                           | -                       | -               | -        |
|                       | Kg. OA Berasau            | 1                   | -                           | -                       | -               | -        |
|                       | Total                     | 11                  | 0.00427 $\pm$ 0.00053       | 0.702 $\pm$ 0.039       | 0.023*          | 0.082*   |
|                       | <b>KELANTAN</b>           |                     |                             |                         |                 |          |
|                       | Kg. Lalang                | 2                   | 0.00162 $\pm$ 0.00072       | 0.600 $\pm$ 0.215       | -1.233          | -0.189   |
|                       | Kg. Dusun Durian          | 1                   | -                           | -                       | -               | -        |
|                       | Kg. Lebur Jaya            | 1                   | -                           | -                       | -               | -        |
|                       | Total                     | 3                   | 0.00209 $\pm$ 0.00055       | 0.714 $\pm$ 0.123       | 0.458           | 0.671    |
|                       | <b>PAHANG</b>             |                     |                             |                         |                 |          |
|                       | Kem Sri Gading            | 3                   | 0.00256 $\pm$ 0.00035       | 0.689 $\pm$ 0.104       | 1.755           | 1.4220   |
|                       | Total                     | 3                   | 0.00256 $\pm$ 0.00035       | 0.689 $\pm$ 0.104       | 1.755           | 1.4220   |
|                       | <b>PERAK</b>              |                     |                             |                         |                 |          |
|                       | Kg. Sg Dara               | 1                   | 0.00000 $\pm$ 0.00000       | 0.000 $\pm$ 0.000       | 0.000           | 0.000    |
|                       | Kg. Draco                 | 1                   | 0.00000 $\pm$ 0.00000       | 0.000 $\pm$ 0.000       | -               | -        |
|                       | Total                     | 1                   | 0.00000 $\pm$ 0.00000       | 0.000 $\pm$ 0.000       | 0.000           | 0.000    |
|                       | <b>NEGERI SEMBILAN</b>    |                     |                             |                         |                 |          |
|                       | Kebun Durian Tekir        | 1                   | -                           | -                       | -               | -        |
|                       | Hutan Lenggeng            | 1                   | 0.00000 $\pm$ 0.00000       | 0.000 $\pm$ 0.000       | 0.000           | 0.000    |
|                       | Total                     | 1                   | 0.00000 $\pm$ 0.00000       | 0.000 $\pm$ 0.000       | 0.000           | 0.000    |
|                       | <b>SELANGOR</b>           |                     |                             |                         |                 |          |
|                       | Hulu Kalong               | 3                   | 0.00195 $\pm$ 0.00195       | 0.800 $\pm$ 0.164       | -0.065          | 0.251    |
|                       | Sg. Sendat                | 3                   | 0.00352 $\pm$ 0.00353       | 0.833 $\pm$ 0.222       | 1.459           | -0.186   |
|                       | Total                     | 6                   | 0.00559 $\pm$ 0.00562       | 0.917 $\pm$ 0.073       | 0.773*          | -0.840*  |
|                       | <b>Overall Total</b>      | 16                  | 0.00417 $\pm$ 0.00420       | 0.783 $\pm$ 0.025       | -0.246***       | -2.515** |
| <i>An. latens</i>     | <b>JOHOR</b>              |                     |                             |                         |                 |          |
|                       | Gunung Pant               | 4                   | 0.00382 $\pm$ 0.00075       | 0.778 $\pm$ 0.091       | 1.109           | 2.482    |
|                       | Total                     | 4                   | 0.00382 $\pm$ 0.00075       | 0.778 $\pm$ 0.091       | 1.109           | 2.482    |
|                       | <b>KELANTAN</b>           |                     |                             |                         |                 |          |
|                       | Kg. Lalang                | 4                   | 0.00420 $\pm$ 0.00096       | 0.706 $\pm$ 0.075       | 1.637           | 1.093    |
|                       | Total                     | 4                   | 0.00420 $\pm$ 0.00096       | 0.706 $\pm$ 0.075       | 1.637           | 1.093    |
|                       | <b>SABAH</b>              |                     |                             |                         |                 |          |
|                       | Danum Valley Field Centre | 3                   | 0.00351 $\pm$ 0.00182       | 0.524 $\pm$ 0.209       | -1.576          | 1.598    |
|                       | Total                     | 3                   | 0.00351 $\pm$ 0.00182       | 0.524 $\pm$ 0.209       | -1.576          | 1.598    |
|                       | <b>SARAWAK</b>            |                     |                             |                         |                 |          |
|                       | Taman Ixora               | 1                   | -                           | -                       | -               | -        |
|                       | Kg. Sawang                | 1                   | -                           | -                       | -               | -        |
|                       | Rumah Sewa Panto          | 4                   | 0.01997 $\pm$ 0.00871       | 1.000 $\pm$ 0.177       | -0.481          | 1.598    |
|                       | Total                     | 5                   | 0.01505 $\pm$ 0.00686       | 0.933 $\pm$ 0.122       | -1.081          | 0.784    |
|                       | <b>Overall Total</b>      | 14                  | 0.02385 $\pm$ 0.00279       | 0.879 $\pm$ 0.036       | 1.237           | 4.573    |
| <i>An. cracens</i>    | <b>PAHANG</b>             |                     |                             |                         |                 |          |
|                       | Sg. Ular                  | 2                   | 0.00074 $\pm$ 0.00021       | 0.467 $\pm$ 0.132       | 0.820           | 0.818    |
|                       | Kem Sri Gading            | 3                   | 0.00125 $\pm$ 0.00013       | 0.637 $\pm$ 0.038       | 1.251           | 1.203    |
|                       | Total                     | 3                   | 0.00115 $\pm$ 0.00011       | 0.616 $\pm$ 0.033       | 1.097           | 1.182    |
|                       | <b>PERLIS</b>             |                     |                             |                         |                 |          |
|                       | Perlis                    | 1                   | 0.00000 $\pm$ 0.00000       | 0.000 $\pm$ 0.000       | 0.000           | 0.000    |
|                       | Total                     | 1                   | 0.00000 $\pm$ 0.00000       | 0.000 $\pm$ 0.000       | 0.000           | 0.000    |



|                         |                           |    |                   |               |         |           |
|-------------------------|---------------------------|----|-------------------|---------------|---------|-----------|
|                         | <b>Overall Total</b>      | 4  | 0.00146 ± 0.00013 | 0.702 ± 0.031 | 0.823   | 0.738     |
| <i>An. balabacensis</i> | <b>SARAWAK</b>            |    |                   |               |         |           |
|                         | Kem Kayu Balak Merarap    | 4  | 0.00117 ± 0.00032 | 0.557 ± 0.092 | -0.848  | -0.521    |
|                         | Simpang Utong             | 3  | 0.00200 ± 0.00067 | 1.000 ± 0.272 | -       | -         |
|                         | Kebun Ldg Sawit Jelapang  | 1  | 0.00000 ± 0.00000 | 0.000 ± 0.000 | -       | -         |
|                         | Total                     | 5  | 0.00121 ± 0.00025 | 0.609 ± 0.068 | -0.609  | -1.344    |
|                         | <b>SABAH</b>              |    |                   |               |         |           |
|                         | Danum valley field centre | 5  | 0.00183 ± 0.00045 | 0.667 ± 0.113 | -0.616  | -0.916    |
|                         | Paradason                 | 4  | 0.00109 ± 0.00048 | 0.491 ± 0.175 | -1.712  | -1.415    |
|                         | Longgom Besar             | 1  | 0.00000 ± 0.00000 | 0.000 ± 0.000 | 0.000   | 0.000     |
|                         | Tinukadan Laut            | 2  | 0.00090 ± 0.00026 | 0.600 ± 0.175 | 1.225   | 0.626     |
|                         | Mambatu Laut              | 3  | 0.00150 ± 0.00041 | 0.800 ± 0.164 | 0.243   | -0.475    |
|                         | Narandang                 | 2  | 0.00150 ± 0.00079 | 0.500 ± 0.265 | -0.800  | 1.099     |
|                         | Tomohon                   | 3  | 0.00120 ± 0.00045 | 0.700 ± 0.218 | -0.973  | -0.829    |
|                         | Minikodong                | 2  | 0.00100 ± 0.00047 | 0.667 ± 0.314 | -       | -         |
|                         | Timbang Dayang            | 2  | 0.00171 ± 0.00028 | 0.571 ± 0.094 | 1.794   | 2.216     |
|                         | Limbuak Laut              | 2  | 0.00037 ± 0.00027 | 0.250 ± 0.180 | -1.055  | -0.182    |
|                         | Sorinsim                  | 1  | 0.00000 ± 0.00000 | 0.000 ± 0.000 | -       | -         |
|                         | Sinangip                  | 2  | 0.00075 ± 0.00040 | 0.500 ± 0.265 | -0.612  | 0.172     |
|                         | Lipasu Lama               | 2  | 0.00200 ± 0.00094 | 0.667 ± 0.314 | -       | -         |
|                         | Paus                      | 2  | 0.00075 ± 0.00040 | 0.500 ± 0.265 | -0.612  | 0.172     |
|                         | Keritan Ulu               | 1  | 0.00141 ± 0.00018 | 0.593 ± 0.050 | 0.0000  | 0.000     |
|                         | Total                     | 10 | 0.00128 ± 0.00018 | 0.555 ± 0.056 | -1.839* | -7.878**  |
|                         | <b>Overall total</b>      | 16 | 0.00141 ± 0.00018 | 0.593 ± 0.050 | -1.968* | -12.546** |
