# Supplementary material for: Cryptic Diversity and Demographic Expansion of Plasmodium knowlesi Malaria Vectors in Malaysia
Source: MDPI journal article supplement (doi:10.3390/genes14071369), 2023-06-28
Supplement: s1 [file s1]

## COI

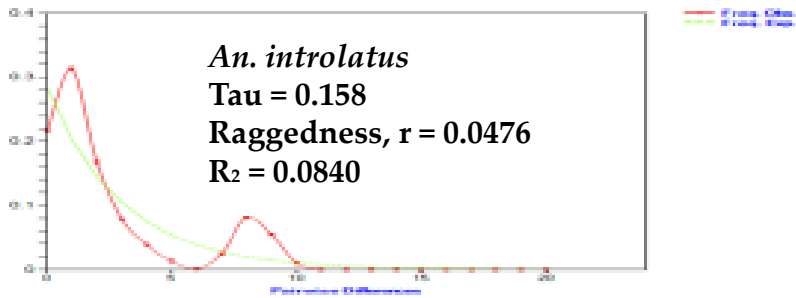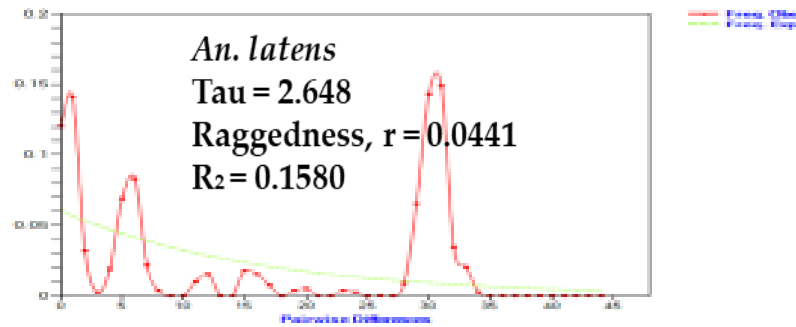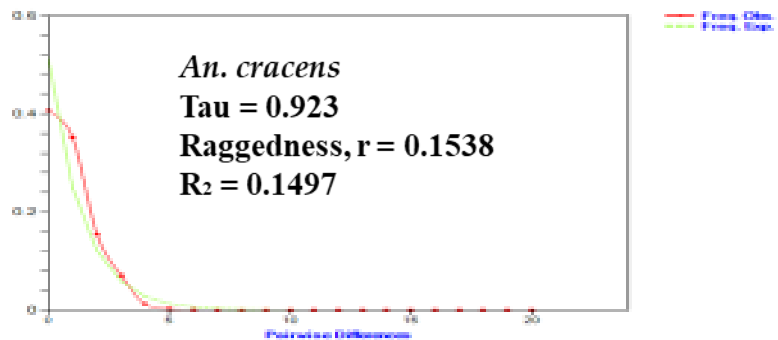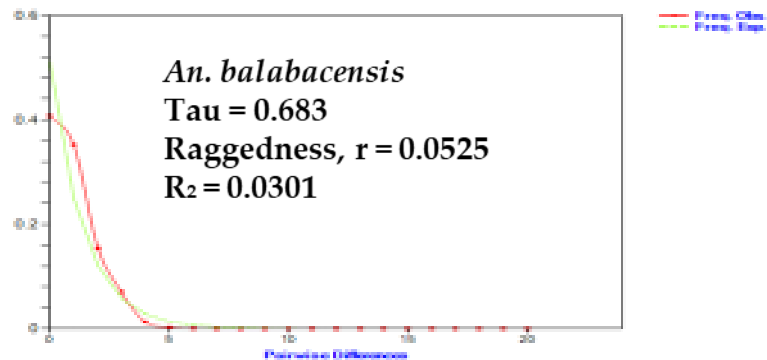

## ITS2

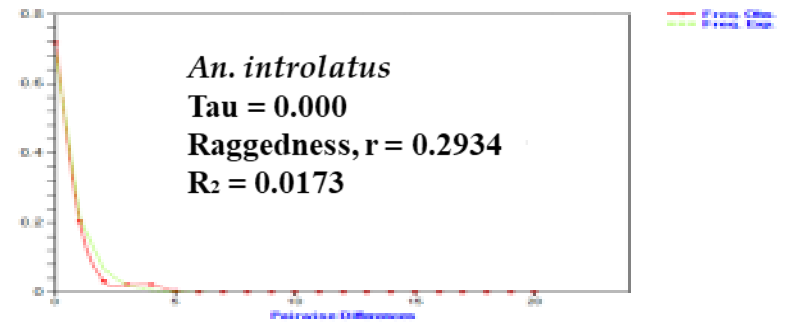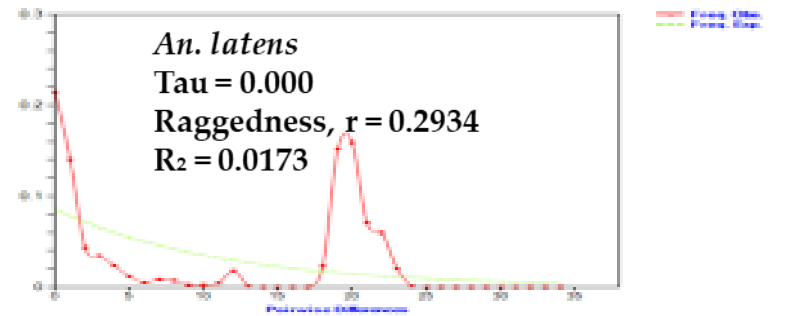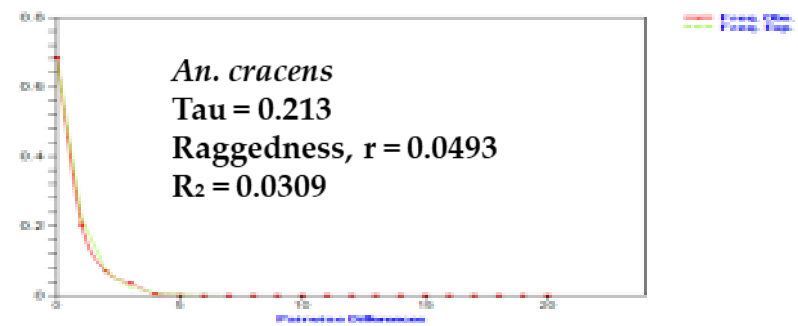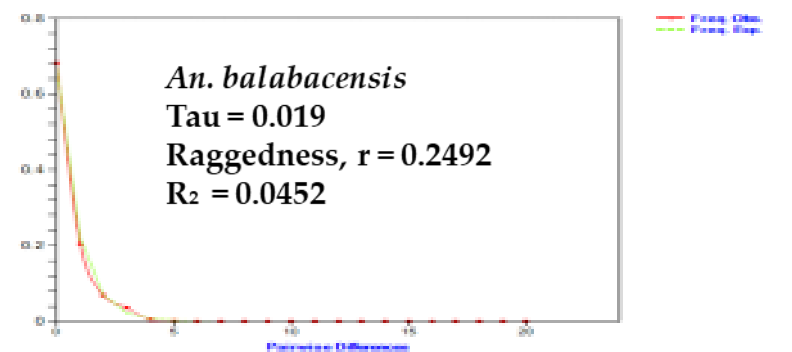

**Figure S1.** Graphs of the mismatch distribution analysis for (a) *An. introlatus*, (b) *An. latens*, (c) *An. cracens* and (d) *An. balabacensis* based on COI and ITS2.
